# Supplementary material for: Complementation of a pathogenic IFNGR2 misfolding mutation with modifiers of N-glycosylation
Source: PubMed Central journal article supplement — J Exp Med. 2008 Aug 4;205(8):1729–37. doi: 10.1084/jem.20071987 (PMC2525579; doi:10.1084/jem.20071987), 2008-08-04
Supplement: jem.20071987_7.pdf [file jem.20071987_7.pdf]

Vogt et al., <http://www.jem.org/cgi/content/full/jem.20071987/DC1>

#### SUPPLEMENTAL DISCUSSION

##### **N-glycosylation and quality control of proteins undergoing trafficking in the secretory pathway**

In the secretory pathway of mammalian cells, glycosidases play a key role in trimming and editing the peptide-linked oligosaccharide, the folding of newly formed glycoproteins, and quality control for nascent proteins in the ER (Fig. 2 B) (1–9). Glucosidases I and II in the ER remove glucose residues from the common oligosaccharide of the nascent polypeptides. This step occurs early in the N-glycosylation maturation process, before other enzymes further trim and edit the glycan moieties on glycoproteins. Moreover, by producing monoglucosylated oligosaccharides, these two enzymes also contribute to the proper folding and subsequent trafficking of glycoproteins in the ER, facilitating concomitant quality control by calnexin–calreticulin. The N-glycans are then processed by ER-mannosidases (such as ER-mannosidase I), which are also involved in glycoprotein folding, quality control, and trafficking. ER-mannosidases may be involved in the proteasomal or nonproteasomal proteolysis of misfolded glycoproteins. Finally, Golgi-endomannosidases provide an alternative pathway for glycan editing, facilitating quality control by calnexin–calreticulin for glycoproteins. During this step, the proteasomal proteolysis of misfolded glycoproteins is promoted. The editing of glycoproteins continues in the Golgi apparatus, with enzymes such as Golgi-mannosidases I and II. A more comprehensive description of the N-glycosylation and quality control processes along the secretory pathway is available from the references (1–9).

#### REFERENCES

1. Herscovics, A. 1999. Importance of glycosidases in mammalian glycoprotein biosynthesis. *Biochim. Biophys. Acta.* 1473:96–107.
2. Cabral, C.M., Y. Liu, and R.N. Sifers. 2001. Dissecting glycoprotein quality control in the secretory pathway. *Trends Biochem. Sci.* 26:619–624.
3. Ellgaard, L., and A. Helenius. 2003. Quality control in the endoplasmic reticulum. *Nat. Rev. Mol. Cell Biol.* 4:181–191.
4. Hebert, D.N., S.C. Garman, and M. Molinari. 2005. The glycan code of the endoplasmic reticulum: asparagine-linked carbohydrates as protein maturation and quality-control tags. *Trends Cell Biol.* 15:364–370.
5. Ohtsubo, K., and J.D. Marth. 2006. Glycosylation in cellular mechanisms of health and disease. *Cell.* 126:855–867.
6. Parodi, A.J. 2000. Protein glucosylation and its role in protein folding. *Annu. Rev. Biochem.* 69:69–93.
7. Helenius, A., and M. Aebi. 2004. Roles of N-linked glycans in the endoplasmic reticulum. *Annu. Rev. Biochem.* 73:1019–1049.
8. Parodi, A.J. 2000. Role of N-oligosaccharide endoplasmic reticulum processing reactions in glycoprotein folding and degradation. *Biochem. J.* 348:1–13.
9. Trombetta, E.S., and A.J. Parodi. 2003. Quality control and protein folding in the secretory pathway. *Annu. Rev. Cell Dev. Biol.* 19:649–676.

**Table S1.** Chemical compounds used and their known targets, as reported in published studies

| C | Compound                                               | Abbr.  | Glu-I | Glu-II | ERM-I | ERM-II | M9M | GM-I | GnT-I | GM-II | Ref.           |
|---|--------------------------------------------------------|--------|-------|--------|-------|--------|-----|------|-------|-------|----------------|
|   | N-(7-oxa-9,9,9-trifluorononyl)deoxynojirimycin         | NF-DNJ |       |        |       |        |     |      |       |       | 1 <sup>a</sup> |
|   | Australine                                             | Aust   |       |        |       |        |     |      |       |       | 2              |
|   | N-dodecyldeoxynojirimycin                              | ND-DNJ |       |        |       |        |     |      |       |       | 1, 3           |
|   | (2S,5S)-bishydroxymethyl-(3R,4R)-bishydroxypyrrolidine | DMDP   |       |        |       |        |     |      |       |       | 2, 4           |
|   | Miglitol                                               | Mgt    |       |        |       |        |     |      |       |       | 5              |
|   | Bromoconduritol (mixture of isomers)                   | Brcd   |       |        |       |        |     |      |       |       | 4, 6           |
|   | Castanospermine                                        | Cst    |       |        |       |        |     |      |       |       | 2, 6–8         |
|   | N-butyldeoxynojirimycin                                | NB-DNJ |       |        |       |        |     |      |       |       | 2, 9           |
|   | Deoxynojirimycin                                       | DNJ    |       |        |       |        |     |      |       |       | 2, 6, 9        |
|   | Nojirimycin-1-sulfonic acid                            | NJ-1-S |       |        |       |        |     |      |       |       | 2              |
|   | N-methyldeoxynojirimycin                               | NM-DNJ |       |        |       |        |     |      |       |       | 2, 4, 9        |
|   | N-(n-nonyl)deoxynojirimycin                            | NN-DNJ |       |        |       |        |     |      |       |       | 1              |
|   | Kifunensine                                            | Kif    |       |        |       |        |     |      |       |       | 2, 7, 8, 10    |
|   | 1,4-dideoxy-1,4-imino-D-mannitol                       | DIM    |       |        |       |        |     |      |       |       | 2, 4, 7        |
|   | Deoxymannojojirimycin                                  | DMJ    |       |        |       |        |     |      |       |       | 2, 4, 6–8      |
|   | Swainsonine                                            | Swn    |       |        |       |        |     |      |       |       | 2, 4, 7        |
|   | Mannostatin A, hydrochloride                           | Mst    |       |        |       |        |     |      |       |       | 2, 11          |
|   | N-(n-butyl)deoxygalactonojojirimycin                   | NB-DGJ |       |        |       |        |     |      |       |       | 9              |
|   | N-(n-nonyl)deoxygalactonojojirimycin                   | NN-DGJ |       |        |       |        |     |      |       |       | 12             |
|   | N-butyldeoxymannojojirimycin                           | NB-DMJ |       |        |       |        |     |      |       |       | 9              |
|   | D-mannojojirimycin                                     | DM     |       |        |       |        |     |      |       |       | b              |
|   | 5-epi-isofagomine                                      | 5-fgm  |       |        |       |        |     |      |       |       | c              |
|   | 2,5-dideoxy-2,5-imino-D-mannitol                       | 2-5-DM |       |        |       |        |     |      |       |       | d              |
|   | 1-deoxy-L-idonojojirimycin                             | 1-Dli  |       |        |       |        |     |      |       |       | e              |
|   | Conduritol B                                           | CdrB   |       |        |       |        |     |      |       |       | 13, 14         |
|   | 2-acetamido-1,2-dideoxynojirimycin                     | 2A-DNJ |       |        |       |        |     |      |       |       | 1, 15          |
|   | (+)-Valienamine                                        | Vali   |       |        |       |        |     |      |       |       | f              |
|   | Voglibose                                              | Vglb   |       |        |       |        |     |      |       |       | 16             |

Chemical compounds complementing the 382–387 mutation are indicated in black (column C). The full name and abbreviation of each chemical compound are indicated. Glu-I, Glu-II, ERM-1, ERM-2, M9M, GM-I, GnT-I, and GM-II are enzymes known to be associated with maturation by N-glycosylation. The effects on these enzymes of the chemical compounds tested are indicated in color (red, inhibition; gray, no effect; white, undescribed effects on N-glycosylation enzymes).

<sup>a</sup>An inhibitor of glucosidase I (Toronto Research Chemicals Inc.).

<sup>b</sup>A potent inhibitor of  $\alpha$ -mannosidase (Toronto Research Chemicals Inc.).

<sup>c</sup>A selective and very strong inhibitor of beta-glucosidase (Toronto Research Chemicals Inc.).

<sup>d</sup>A glucosidase inhibitor (Toronto Research Chemicals Inc.).

<sup>e</sup>An inhibitor of yeast  $\alpha$ -glucosidase (Toronto Research Chemicals Inc.).

<sup>f</sup>A glucosidase inhibitor (Toronto Research Chemicals Inc.).

## REFERENCES

- Sawkar, A.R., W.C. Cheng, E. Beutler, C.H. Wong, W.E. Balch, and J.W. Kelly. 2002. Chemical chaperones increase the cellular activity of N370S beta-glucosidase: a therapeutic strategy for Gaucher disease. *Proc. Natl. Acad. Sci. USA* 99:15428–15433.
- Elbein, A.D. 1991. Glycosidase inhibitors: inhibitors of N-linked oligosaccharide processing. *FASEB J.* 5:3055–3063.
- Shailubhai, K., M.A. Pratta, and I.K. Vijay. 1987. Purification and characterization of glucosidase I involved in N-linked glycoprotein processing in bovine mammary gland. *Biochem. J.* 247:555–562.
- McDowell, W., and R.T. Schwarz. 1988. Dissecting glycoprotein biosynthesis by the use of specific inhibitors. *Biochimie.* 70:1535–1549.
- Lembcke, B., U.R. Folsch, and W. Creutzfeldt. 1985. Effect of 1-desoxynojirimycin derivatives on small intestinal disaccharidase activities and on active transport in vitro. *Digestion.* 31:120–127.
- Helenius, A. 1994. How N-linked oligosaccharides affect glycoprotein folding in the endoplasmic reticulum. *Mol. Biol. Cell.* 5:253–265.
- Liu, Y., P. Choudhury, C.M. Cabral, and R.N. Sifers. 1999. Oligosaccharide modification in the early secretory pathway directs the selection of a misfolded glycoprotein for degradation by the proteasome. *J. Biol. Chem.* 274:5861–5867.
- Spiro, R.G. 2004. Role of N-linked polymannose oligosaccharides in targeting glycoproteins for endoplasmic reticulum-associated degradation. *Cell. Mol. Life Sci.* 61:1025–1041.
- Platt, F.M., G.R. Neises, G.B. Karlsson, R.A. Dwek, and T.D. Butters. 1994. N-butyldeoxygalactonojojirimycin inhibits glycolipid biosynthesis but does not affect N-linked oligosaccharide processing. *J. Biol. Chem.* 269:27108–27114.
- Tsuda, H., F. Tokunaga, H. Nagamitsu, and T. Koide. 2006. Characterization of endoplasmic reticulum-associated degradation of a protein S mutant identified in a family of quantitative protein S deficiency. *Thromb. Res.* 117:323–331.
- Tropea, J.E., G.P. Kaushal, I. Pastuszak, M. Mitchell, T. Aoyagi, R.J. Molyneux, and A.D. Elbein. 1990. Mannostatin A, a new glycoprotein-processing inhibitor. *Biochemistry.* 29:10062–10069.
- Lu, X., T. Tran, E. Simsek, and T.M. Block. 2003. The alkylated imino sugar, n-(n-Nonyl)-deoxygalactonojojirimycin, reduces the amount of hepatitis B virus nucleocapsid in tissue culture. *J. Virol.* 77:11933–11940.
- Kanfer, J.N., G. Legler, J. Sullivan, S.S. Raghavan, and R.A. Mumford. 1975. The Gaucher mouse. *Biochem. Biophys. Res. Commun.* 67:85–90.
- Datta, S.C., and N.S. Radin. 1988. Normalization of liver glucosylceramide levels in the "Gaucher" mouse by phosphatidylserine injection. *Biochem. Biophys. Res. Commun.* 152:155–160.
- Woynarowska, B., H. Wikiel, M. Sharma, N. Carpenter, G.W. Fleet, and R.J. Bernacki. 1992. Inhibition of human ovarian carcinoma cell- and hexosaminidase- mediated degradation of extracellular matrix by sugar analogs. *Anticancer Res.* 12:161–166.
- Shinozaki, K., M. Suzuki, M. Ikebuchi, J. Hirose, Y. Hara, and Y. Harano. 1996. Improvement of insulin sensitivity and dyslipidemia with a new alpha-glucosidase inhibitor, voglibose, in nondiabetic hyperinsulinemic subjects. *Metabolism.* 45:731–737.
